# Supplementary material for: Financial and Clinical Impact of Virtual Care During the COVID-19 Pandemic: Difference-in-Differences Analysis
Source: PubMed Central journal article supplement (PMC9879318; doi:10.2196/44121), 2023-01-25
Supplement: jmir_v25i1e44121_app1.pdf [file jmir_v25i1e44121_app1.pdf]

## COVID-19 Remote Patient Monitoring (CRPM) Enrollment Form

|                                                                                                                                                                                                                                                                                                                                                                                                                                                                                                                                                                                                                                                                                                                     |                                                                                                                                                                                                                                                                                                                                           |                                                                                                                                                                                                                       |
|---------------------------------------------------------------------------------------------------------------------------------------------------------------------------------------------------------------------------------------------------------------------------------------------------------------------------------------------------------------------------------------------------------------------------------------------------------------------------------------------------------------------------------------------------------------------------------------------------------------------------------------------------------------------------------------------------------------------|-------------------------------------------------------------------------------------------------------------------------------------------------------------------------------------------------------------------------------------------------------------------------------------------------------------------------------------------|-----------------------------------------------------------------------------------------------------------------------------------------------------------------------------------------------------------------------|
| <i>Referring provider to complete this section</i>                                                                                                                                                                                                                                                                                                                                                                                                                                                                                                                                                                                                                                                                  |                                                                                                                                                                                                                                                                                                                                           | Date: (YYYY-MM-DD)                                                                                                                                                                                                    |
| <b>Patient Name (Last Name, First Name, MI):</b>                                                                                                                                                                                                                                                                                                                                                                                                                                                                                                                                                                                                                                                                    | <b>DoDID:</b>                                                                                                                                                                                                                                                                                                                             | <b>DOB/Age:</b> _____ / _____ years                                                                                                                                                                                   |
| <b>Diagnosis:</b>                                                                                                                                                                                                                                                                                                                                                                                                                                                                                                                                                                                                                                                                                                   | <b>COVID-19 Status:</b><br><input type="checkbox"/> Positive <input type="checkbox"/> Negative <input type="checkbox"/> Pending   N/A                                                                                                                                                                                                     | <b>Admitting Physician:</b>                                                                                                                                                                                           |
| <b>Please Select :</b>                                                                                                                                                                                                                                                                                                                                                                                                                                                                                                                                                                                                                                                                                              |                                                                                                                                                                                                                                                                                                                                           |                                                                                                                                                                                                                       |
| <p><b>High Risk:</b> _____</p> <p>High Risk: Resting or exertional O2 requirement upon discharge; or high-risk co-morbid conditions (e.g.: HF, CLD, PHTN)</p> <p>Monitoring: Continuous, passive vital signs +/- integrated peripherals</p> <p>Engagement: Twice daily review (or by alert) of clinical status, weekly video call</p>                                                                                                                                                                                                                                                                                                                                                                               | <p><b>Medium Risk:</b> _____</p> <p>Medium Risk: Resting or exertional dyspnea upon discharge; or moderate-risk co-morbid conditions (e.g.: DM2, HTN, obesity)</p> <p>Monitoring: Continuous, passive vital signs +/- integrated peripherals</p> <p>Engagement: Once daily review (or by alert) of clinical status, weekly video call</p> | <p><b>Low Risk:</b> _____</p> <p>Low Risk: No significant resting or exertional dyspnea; or no significant co-morbid conditions</p> <p>Monitoring: Intermittent vital signs</p> <p>Engagement: As needed by alert</p> |
| <b>Monitored VS Basic Parameters:</b>                                                                                                                                                                                                                                                                                                                                                                                                                                                                                                                                                                                                                                                                               |                                                                                                                                                                                                                                                                                                                                           | <b>Please indicate alternate parameters if desired:</b>                                                                                                                                                               |
| <p><b>Abnormal VS:</b></p> <ul style="list-style-type: none"> <li>• Temperature: <math>\geq 101^{\circ}</math> F or <math>\leq 96.5^{\circ}</math> F</li> <li>• Respiratory Rate: <math>\geq 20</math> or <math>\leq 8</math></li> <li>• Heart Rate: <math>\geq 120</math> or <math>\leq 40</math></li> <li>• SpO2: <math>\leq 88\%</math></li> </ul> <p><b>Extremely Abnormal VS:</b></p> <ul style="list-style-type: none"> <li>• Temperature: <math>\geq 103^{\circ}</math> F or <math>\leq 95^{\circ}</math> F</li> <li>• Respiratory Rate: <math>\geq 30</math> or <math>\leq 5</math></li> <li>• Heart Rate: <math>\geq 150</math> or <math>\leq 30</math></li> <li>• SpO2: <math>\leq 85\%</math></li> </ul> |                                                                                                                                                                                                                                                                                                                                           |                                                                                                                                                                                                                       |
| <p><b>Will CPRM Enrollment Prevent an In-Patient Admission?</b>   YES   NO   N/A</p> <p><b>Will CPRM Enrollment Decrease In-Patient Bed-Days?</b>   YES   NO   N/A   <b>If yes, approx. how many?</b> _____</p> <p><b>Comments:</b> (Pertinent History of Present Illness)</p>                                                                                                                                                                                                                                                                                                                                                                                                                                      |                                                                                                                                                                                                                                                                                                                                           |                                                                                                                                                                                                                       |
| <b>Provider Signature:</b>                                                                                                                                                                                                                                                                                                                                                                                                                                                                                                                                                                                                                                                                                          | <b>Print Name:</b>                                                                                                                                                                                                                                                                                                                        | <b>Phone Number:</b>                                                                                                                                                                                                  |

|                                                                                                                                                                                                                                                                                                                                                                                                                                                             |                                                                                                                                                                             |                                                                                                                                                                                                                                                  |
|-------------------------------------------------------------------------------------------------------------------------------------------------------------------------------------------------------------------------------------------------------------------------------------------------------------------------------------------------------------------------------------------------------------------------------------------------------------|-----------------------------------------------------------------------------------------------------------------------------------------------------------------------------|--------------------------------------------------------------------------------------------------------------------------------------------------------------------------------------------------------------------------------------------------|
| <i>Nursing/Support staff to complete remainder of form</i>                                                                                                                                                                                                                                                                                                                                                                                                  |                                                                                                                                                                             |                                                                                                                                                                                                                                                  |
| <b>Referring MTF:</b>                                                                                                                                                                                                                                                                                                                                                                                                                                       | <b>Sending/Admitting Department:</b>                                                                                                                                        | <b>Anticipated Time/Date of D/C:</b>                                                                                                                                                                                                             |
| <b>Gender:</b><br><input type="checkbox"/> Male <input type="checkbox"/> Female                                                                                                                                                                                                                                                                                                                                                                             | <b>Ht:</b> _____<br><b>Wt:</b> _____                                                                                                                                        | <b>Preferred language:</b> <i>Language chosen will be language patient will see on tablet.</i><br><input type="checkbox"/> English <input type="checkbox"/> Spanish                                                                              |
| <b>Phone Number:</b> <input type="checkbox"/> Cell <input type="checkbox"/> Home                                                                                                                                                                                                                                                                                                                                                                            | <b>Email Address:</b>                                                                                                                                                       | <b>County:</b>                                                                                                                                                                                                                                   |
| <b>Physical Address (NOT mailing address):</b>                                                                                                                                                                                                                                                                                                                                                                                                              |                                                                                                                                                                             | <b>City:</b>                                                                                                                                                                                                                                     |
| <b>Zip:</b>                                                                                                                                                                                                                                                                                                                                                                                                                                                 |                                                                                                                                                                             |                                                                                                                                                                                                                                                  |
| <b>Ethnicity:</b><br><input type="checkbox"/> White (Not Hispanic or Latino)<br><input type="checkbox"/> Native Hawaiian or Other Pacific Islander (Not Hispanic or Latino)<br><input type="checkbox"/> American Indian or Native Alaskan (Not Hispanic or Latino)<br><input type="checkbox"/> Asian (Not Hispanic or Latino)<br><input type="checkbox"/> Hispanic or Latino<br><input type="checkbox"/> Black or African American (Not Hispanic or Latino) | <b>Any pacemaker or other implants?</b> Indicate type/place<br><input type="checkbox"/> Yes <input type="checkbox"/> No _____<br><i>*Do not charge device while wearing</i> | <b>Any upper arm sleeve tattoos?</b><br><input type="checkbox"/> Yes <input type="checkbox"/> No <input type="checkbox"/> Right <input type="checkbox"/> Left<br><i>*Patients with bilateral upper arm tattoos are ineligible to wear device</i> |
| <b>Alternate/Emergency Contact Person &amp; Relationship:</b>                                                                                                                                                                                                                                                                                                                                                                                               |                                                                                                                                                                             | <b>Phone number: (Different from above)</b>                                                                                                                                                                                                      |
| <b>CORE KIT ID:</b> (ex: green uat nine)                                                                                                                                                                                                                                                                                                                                                                                                                    | <b>MULTI KIT ID:</b> (ex: cyan uat five)                                                                                                                                    |                                                                                                                                                                                                                                                  |
|                                                                                                                                                                                                                                                                                                                                                                         |                                                                                                                                                                             |                                                                                                                                                                                                                                                  |
| <b>Additional Comments:</b> (Home O2, pain, etc.)                                                                                                                                                                                                                                                                                                                                                                                                           |                                                                                                                                                                             |                                                                                                                                                                                                                                                  |
| <b>Inpatient Unit Name:</b>                                                                                                                                                                                                                                                                                                                                                                                                                                 |                                                                                                                                                                             | <b>Nurse's Station Telephone Number:</b>                                                                                                                                                                                                         |
| <b>Prepared by:</b> (Name, Signature, Title)                                                                                                                                                                                                                                                                                                                                                                                                                |                                                                                                                                                                             |                                                                                                                                                                                                                                                  |
| <b>Department:</b>                                                                                                                                                                                                                                                                                                                                                                                                                                          | <b>Contact Number:</b>                                                                                                                                                      | <b>Time/Date Prepared:</b>                                                                                                                                                                                                                       |

Please upload this complete form and the Informed Consent into the **Virtual Health Care Coordination Application (VHCCA)** site in CarePoint at the following link:
